# Supplementary figures and images for: Reactive lithium fluoride revitalizes bulk-interface Na-ion transport in all-solid-state PEO-based sodium batteries
Source: Royal Society of Chemistry journal article supplement (doi:10.1039/d5sc08784h), 2026-01-01

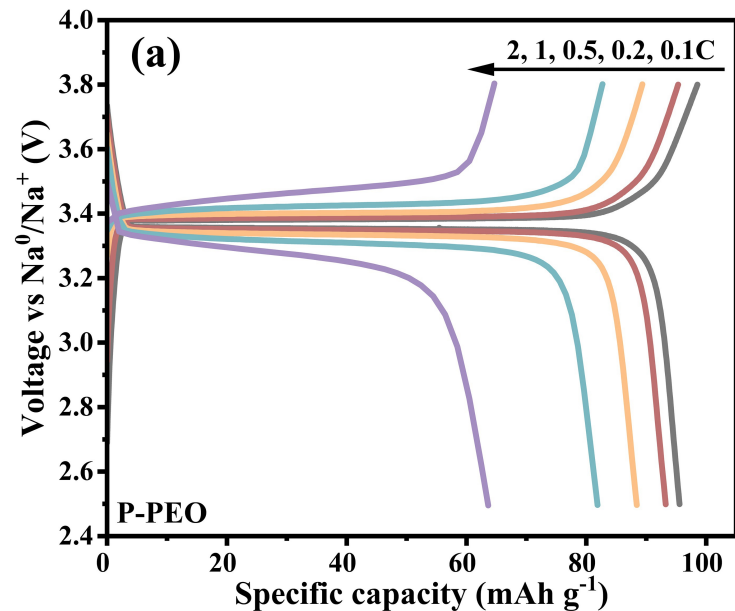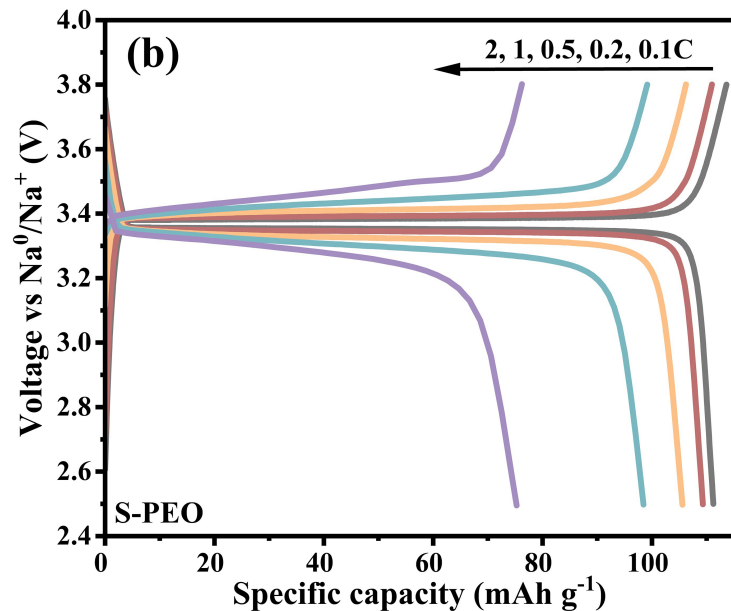

Supplement: d5sc08784h11.pdf [file d5sc08784h11.pdf]

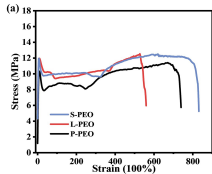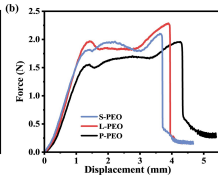

Supplement: d5sc08784h16.pdf [file d5sc08784h16.pdf]

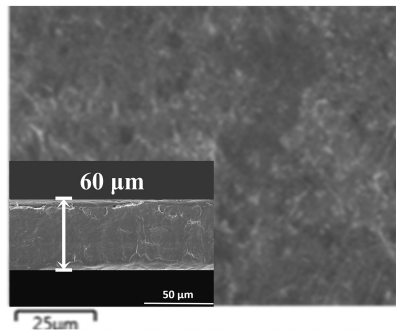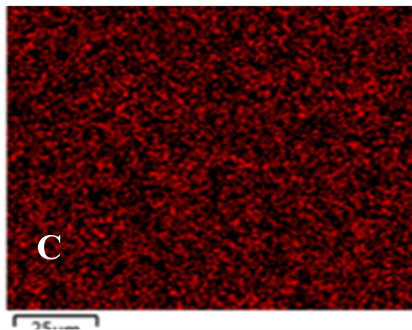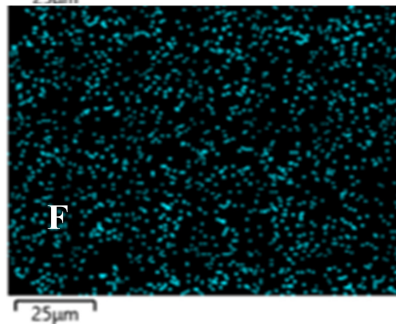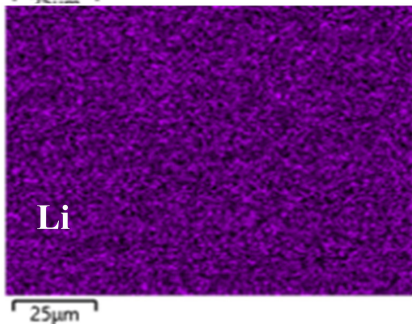

Supplement: d5sc08784h3.pdf [file d5sc08784h3.pdf]
